# Supplementary material for: Heterogeneity of Melanoma Cell Responses to Sleep Apnea-Derived Plasma Exosomes and to Intermittent Hypoxia
Source: MDPI journal article supplement (doi:10.3390/cancers13194781), 2021-09-24
Supplement: s1 [file s1]

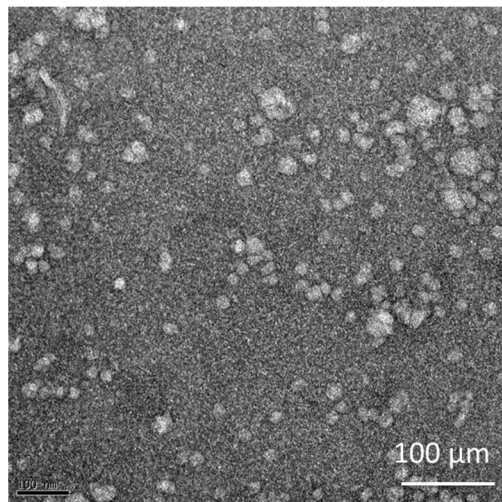

(A)

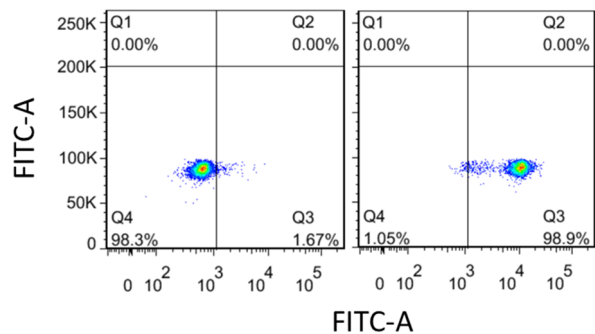

(B)

**Figure S1.** Characterization and quantification of plasma derived exosomes from OSA-V1 and OSA-V2 subjects. (A) Representative electron microscope image for isolated exosomes, scale bar 100 nm. (B) Flow cytometry analyses for exosome surface markers including tetraspanin (CD63) marker in the presence or absence of exosomes were analyzed using a FACS Calibur instrument. Bead flow separation data for exosomes were analyzed using the various capture antibodies followed by Exo-FITC staining, and independent experiments were repeated 4 times. The FITC flow cytometric intensities were then plotted versus the number of exosome particles input into the flow reaction. The data are graphed showing forward scatter versus FITC intensity (n=6).

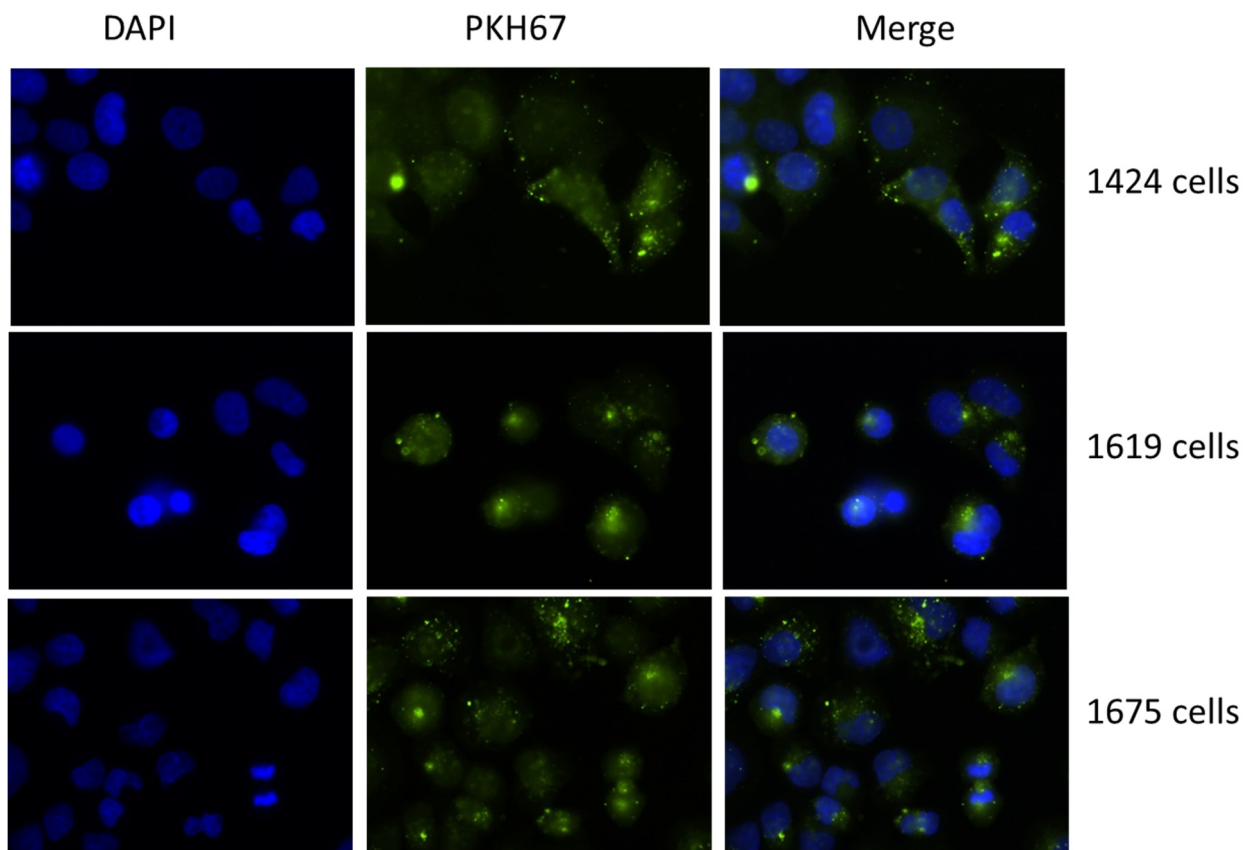

**Figure S2:** Confocal microscope images illustrating exosomes derived from OSA up taken by naïve human melanoma cells. Exosomes from plasma of OSA-V1 and OSA-V2 were labeled with a PKH67-Green Fluorescent Cell Linker Kit. Human melanoma cells were grown on coverslips for 24 h, and the PKH67-labeled exosomes from OSA-V1 and OSA-V2 were added to the melanoma cells at 37°C for 24 h. Cells were washed and stained with nuclei (blue) stained with DAPI. As controls, no exosomes were used but PKH26 was added to the cell medium. Exosome uptake was measured using confocal laser scanning microscopy (LSP5) at 490 nm excitation and 502 nm emission (n = 6; scale bar: 10  $\mu$ m).

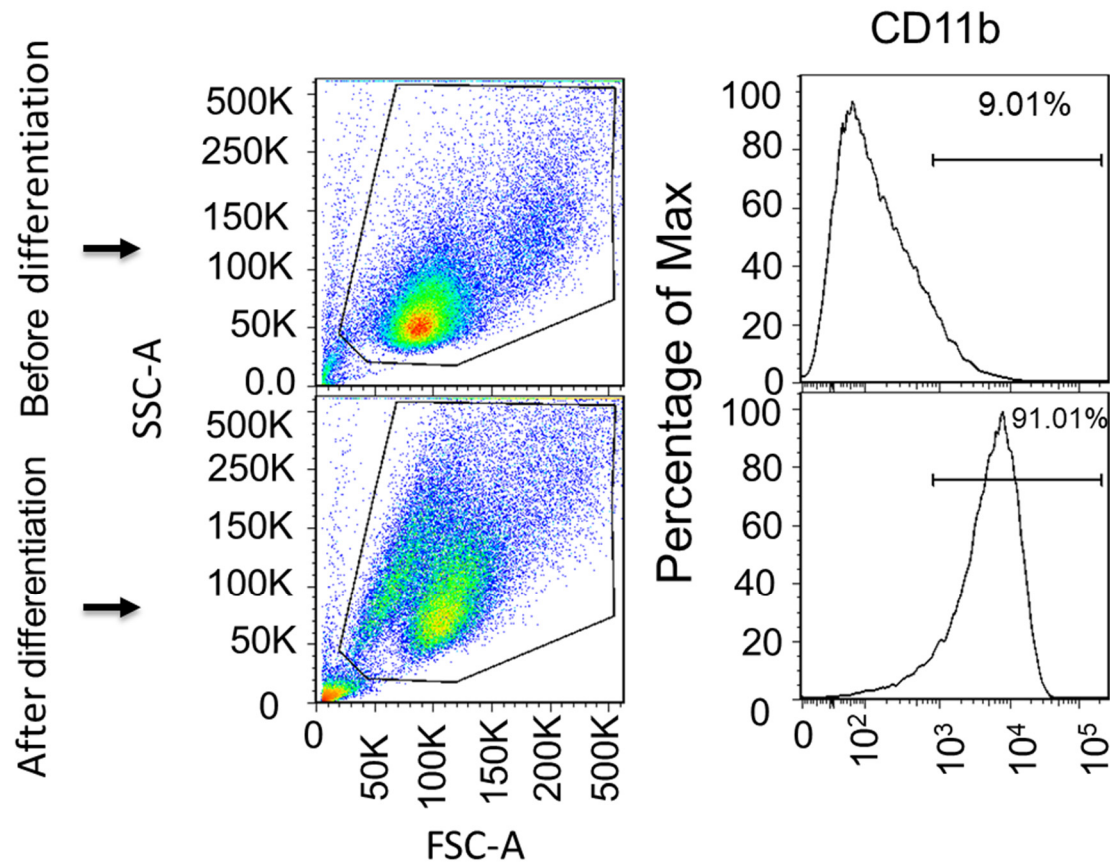

**Figure S3.** THP-1 cells displayed altered expression of CD11b when monocytes were differentiated into macrophages by PMA as described in the Materials and Methods section. Cells were stained with CD11b antibody and THP-1 cells were quantified by flow cytometry. A representative histogram of three independent experiments is displayed.

**Table S1. A:** List of most significant gene ontology including cellular component involved in 8172 unique target predications genes found in 46 miRNAs in 1424 cells exposed to IH compared to normoxia.

| Cellular Component ID | Term                                     | %     | p Value  | Benjamini   |
|-----------------------|------------------------------------------|-------|----------|-------------|
| GO:0005654            | nucleoplasm                              | 17.63 | 1.81E-10 | 2.20E-07    |
| GO:0044428            | nuclear part                             | 22.95 | 5.06E-10 | 3.07E-07    |
| GO:0097060            | synaptic membrane                        | 2.06  | 2.07E-09 | 8.40E-07    |
| GO:0031981            | nuclear lumen                            | 20.74 | 3.65E-09 | 1.11E-06    |
| GO:0005634            | nucleus                                  | 39.13 | 1.47E-08 | 1.51E-06    |
| GO:0000139            | Golgi membrane                           | 4.53  | 4.25E-08 | 8.60E-06    |
| GO:0098590            | plasma membrane region                   | 5.77  | 1.84E-06 | 2.79E-04    |
| GO:0005794            | Golgi apparatus                          | 8.82  | 2.35E-06 | 3.17E-04    |
| GO:0043229            | intracellular organelle                  | 64.98 | 3.56E-06 | 2.17E-04    |
| GO:0045211            | postsynaptic membrane                    | 1.51  | 1.06E-05 | 0.001166535 |
| GO:0005737            | cytoplasm                                | 58.05 | 1.77E-05 | 0.000116653 |
| GO:0044431            | Golgi apparatus part                     | 5.53  | 2.18E-05 | 0.001894282 |
| GO:0043231            | intracellular membrane-bounded organelle | 59.35 | 3.13E-05 | 0.000216653 |
| GO:0098797            | plasma membrane protein complex          | 3.33  | 3.53E-05 | 0.002680256 |

|            |                                              |       |          |             |
|------------|----------------------------------------------|-------|----------|-------------|
| GO:0036464 | cytoplasmic ribonucleoprotein granule        | 1.08  | 4.64E-05 | 0.002812351 |
| GO:0030672 | synaptic vesicle membrane                    | 0.53  | 6.54E-05 | 0.003774321 |
| GO:0099501 | exocytic vesicle membrane                    | 0.53  | 6.54E-05 | 0.003774321 |
| GO:0070382 | exocytic vesicle                             | 1.03  | 8.92E-05 | 0.004913701 |
| GO:0035770 | ribonucleoprotein granule                    | 1.13  | 1.28E-04 | 0.006722612 |
| GO:0034702 | ion channel complex                          | 1.89  | 1.68E-04 | 0.008458595 |
| GO:0016604 | nuclear body                                 | 2.30  | 2.32E-04 | 0.011215156 |
| GO:0015630 | microtubule cytoskeleton                     | 6.47  | 2.71E-04 | 0.012583619 |
| GO:0033267 | axon part                                    | 1.47  | 2.99E-04 | 0.01334978  |
| GO:0000118 | histone deacetylase complex                  | 0.51  | 3.05E-04 | 0.013170595 |
| GO:0044853 | plasma membrane raft                         | 0.64  | 3.18E-04 | 0.013257284 |
| GO:0070603 | SWI/SNF superfamily-type complex             | 0.59  | 4.21E-04 | 0.016922863 |
| GO:0044451 | nucleoplasm part                             | 4.45  | 4.43E-04 | 0.017211109 |
| GO:0098802 | plasma membrane receptor complex             | 1.20  | 5.17E-04 | 0.019454072 |
| GO:0090545 | CHD-type complex                             | 0.20  | 5.29E-04 | 0.019276794 |
| GO:0016581 | NuRD complex                                 | 0.20  | 5.29E-04 | 0.019276794 |
| GO:0090568 | nuclear transcriptional repressor complex    | 0.23  | 5.97E-04 | 0.021101325 |
| GO:1902495 | transmembrane transporter complex            | 2.06  | 9.12E-04 | 0.031163261 |
| GO:0005802 | trans-Golgi network                          | 1.34  | 9.26E-04 | 0.030774949 |
| GO:0009898 | cytoplasmic side of plasma membrane          | 1.10  | 9.63E-04 | 0.031157822 |
| GO:0055037 | recycling endosome                           | 0.97  | 0.001083 | 0.03406217  |
| GO:0008287 | protein serine/threonine phosphatase complex | 0.40  | 0.00126  | 0.038506442 |
| GO:0070013 | intracellular organelle lumen                | 23.79 | 0.00127  | 0.037506442 |
| GO:0030658 | transport vesicle membrane                   | 1.08  | 0.001282 | 0.03729073  |
| GO:0000932 | cytoplasmic mRNA processing body             | 0.59  | 0.001444 | 0.040948571 |
| GO:0030133 | transport vesicle                            | 2.17  | 0.001475 | 0.040845451 |
| GO:0005829 | cytosol                                      | 18.79 | 0.00179  | 0.048273906 |
| GO:0048471 | perinuclear region of cytoplasm              | 3.81  | 0.001894 | 0.049892377 |

**Table S1. B:** List of most significant gene ontology including biological process involved in 8172 unique target predication genes found in 46 miRNAs in 1424 cells exposed to IH compared to normoxia.

| Biological Process ID | Biological Process Term                                   | %           | p Value  | Benjamin |
|-----------------------|-----------------------------------------------------------|-------------|----------|----------|
| GO:0007399            | nervous system development                                | 13.66421569 | 2.39E-23 | 1.80E-19 |
| GO:0036211            | protein modification process                              | 22.59803922 | 3.50E-22 | 1.31E-18 |
| GO:0006464            | cellular protein modification process                     | 22.59803922 | 3.50E-22 | 1.31E-18 |
| GO:0048468            | cell development                                          | 12.35294118 | 1.79E-20 | 4.48E-17 |
| GO:2000112            | regulation of cellular macromolecule biosynthetic process | 23.21078431 | 1.82E-18 | 3.43E-15 |
| GO:0030182            | neuron differentiation                                    | 8.014705882 | 3.54E-18 | 5.32E-15 |
| GO:0051252            | regulation of RNA metabolic process                       | 21.91176471 | 1.29E-17 | 1.21E-14 |
| GO:0022008            | neurogenesis                                              | 9.215686275 | 1.46E-16 | 9.26E-14 |
| GO:0006355            | regulation of transcription, DNA-templated                | 20.89460784 | 3.28E-15 | 2.50E-12 |
| GO:0007417            | central nervous system development                        | 6.004901961 | 5.30E-15 | 3.64E-12 |
| GO:0010604            | positive regulation of macromolecule metabolic process    | 16.83823529 | 9.34E-15 | 5.84E-12 |
| GO:0045935            | positive regulation of compound metabolic process         | 10.26960784 | 9.99E-15 | 5.77E-12 |
| GO:2001141            | regulation of RNA biosynthetic process                    | 21.06617647 | 1.02E-14 | 5.48E-12 |
| GO:0045893            | positive regulation of transcription, DNA-templated       | 8.517156863 | 1.91E-14 | 9.56E-12 |
| GO:0048666            | neuron development                                        | 6.323529412 | 2.30E-14 | 1.08E-11 |
| GO:0051254            | positive regulation of RNA metabolic process              | 8.87254902  | 3.39E-14 | 1.50E-11 |
| GO:0035556            | intracellular signal transduction                         | 15.71078431 | 3.53E-14 | 1.47E-11 |
| GO:0010557            | positive regulation of macromolecule biosynthetic process | 9.87745098  | 5.46E-14 | 2.16E-11 |
| GO:0006351            | transcription, DNA-templated                              | 20.73529412 | 1.84E-13 | 6.90E-11 |
| GO:0009887            | organ morphogenesis                                       | 6.421568627 | 2.28E-13 | 8.14E-11 |
| GO:1902680            | positive regulation of RNA biosynthetic process           | 8.541666667 | 4.11E-13 | 1.40E-10 |
| GO:0016569            | covalent chromatin modification                           | 3.823529412 | 5.44E-13 | 1.78E-10 |
| GO:0010628            | positive regulation of gene expression                    | 10.31862745 | 8.24E-13 | 2.58E-10 |
| GO:0000902            | cell morphogenesis                                        | 7.781862745 | 1.34E-12 | 4.04E-10 |
| GO:0031175            | neuron projection development                             | 5.367647059 | 1.56E-12 | 4.52E-10 |
| GO:0031328            | positive regulation of cellular biosynthetic process      | 10.49019608 | 2.19E-12 | 6.10E-10 |
| GO:0007420            | brain development                                         | 4.583333333 | 2.53E-12 | 6.77E-10 |

|            |                                                           |             |          |          |
|------------|-----------------------------------------------------------|-------------|----------|----------|
| GO:0048513 | animal organ development                                  | 18.06372549 | 3.67E-12 | 9.50E-10 |
| GO:0032990 | cell part morphogenesis                                   | 5.306372549 | 1.90E-11 | 4.75E-09 |
| GO:0048858 | cell projection morphogenesis                             | 5.183823529 | 2.56E-11 | 6.21E-09 |
| GO:0032774 | RNA biosynthetic process                                  | 22.08333333 | 3.60E-11 | 8.44E-09 |
| GO:0050804 | modulation of synaptic transmission                       | 2.095588235 | 6.79E-11 | 1.54E-08 |
| GO:0090304 | nucleic acid metabolic process                            | 28.62745098 | 6.79E-11 | 1.56E-08 |
| GO:0007167 | enzyme linked receptor protein signaling                  | 6.053921569 | 6.92E-11 | 1.49E-08 |
| GO:0009966 | regulation of signal transduction                         | 15.77205882 | 9.31E-11 | 1.94E-08 |
| GO:0048812 | neuron projection morphogenesis                           | 3.676470588 | 9.62E-11 | 1.95E-08 |
| GO:0034645 | cellular macromolecule biosynthetic process               | 27.83088235 | 1.22E-10 | 1.98E-08 |
| GO:0000904 | cell morphogenesis involved in differentiation            | 4.87745098  | 2.12E-10 | 4.09E-08 |
| GO:2000113 | negative regulation of cellular macromolecule             | 8.088235294 | 2.55E-10 | 4.79E-08 |
| GO:0051960 | regulation of nervous system development                  | 4.963235294 | 2.68E-10 | 4.90E-08 |
| GO:0050767 | regulation of neurogenesis                                | 4.460784314 | 2.92E-10 | 5.22E-08 |
| GO:0072358 | cardiovascular system development                         | 5.943627451 | 5.59E-10 | 9.77E-08 |
| GO:0072359 | circulatory system development                            | 5.943627451 | 5.59E-10 | 9.77E-08 |
| GO:0016358 | dendrite development                                      | 1.495098039 | 5.92E-10 | 1.01E-07 |
| GO:0010558 | negative regulation of macromolecule biosynthetic process | 8.553921569 | 1.22E-09 | 2.04E-07 |
| GO:0034654 | nucleobase-containing compound biosynthetic process       | 24.27696078 | 1.23E-09 | 2.05E-07 |
| GO:0045664 | regulation of neuron differentiation                      | 3.713235294 | 1.58E-09 | 2.53E-07 |
| GO:0031327 | negative regulation of cellular biosynthetic process      | 8.884803922 | 1.62E-09 | 2.53E-07 |

**Table S1. C:** List of most significant gene ontology including molecular function involved in 8172 unique target predications genes found in 46 miRNAs in 1424 cells exposed to IH compared to normoxia.

| Molecular Function ID | Molecular Function Term                           | %      | p Value  | Benjamini |
|-----------------------|---------------------------------------------------|--------|----------|-----------|
| GO:0000975            | regulatory region DNA binding                     | 5.613  | 1.44E-12 | 1.55E-09  |
| GO:0003690            | double-stranded DNA binding                       | 5.306  | 2.31E-12 | 1.24E-09  |
| GO:0032555            | purine ribonucleotide binding                     | 11.275 | 3.06E-11 | 8.24E-09  |
| GO:0004672            | protein kinase activity                           | 4.350  | 3.86E-11 | 8.31E-09  |
| GO:0017076            | purine nucleotide binding                         | 11.324 | 5.67E-11 | 1.02E-08  |
| GO:0032550            | purine ribonucleoside binding                     | 11.066 | 5.70E-11 | 8.76E-09  |
| GO:0032553            | ribonucleotide binding                            | 11.324 | 8.76E-11 | 1.18E-08  |
| GO:0032559            | adenyl ribonucleotide binding                     | 9.265  | 2.22E-10 | 2.66E-08  |
| GO:0030554            | adenyl nucleotide binding                         | 9.314  | 3.08E-10 | 3.32E-08  |
| GO:0005524            | ATP binding                                       | 9.044  | 4.17E-10 | 4.08E-08  |
| GO:0043565            | sequence-specific DNA binding                     | 6.703  | 1.15E-09 | 1.03E-07  |
| GO:0061630            | ubiquitin protein ligase activity                 | 1.422  | 2.77E-06 | 2.29E-04  |
| GO:0031267            | small GTPase binding                              | 1.973  | 3.66E-06 | 2.81E-04  |
| GO:0031625            | ubiquitin protein ligase binding                  | 1.949  | 3.81E-06 | 2.73E-04  |
| GO:0019901            | protein kinase binding                            | 3.309  | 1.94E-05 | 0.001302  |
| GO:0035004            | phosphatidylinositol 3-kinase activity            | 0.576  | 4.75E-05 | 0.003004  |
| GO:0052813            | phosphatidylinositol bisphosphate kinase activity | 0.527  | 1.78E-04 | 0.010576  |
| GO:0000287            | magnesium ion binding                             | 1.360  | 3.20E-04 | 0.017966  |
| GO:0008017            | microtubule binding                               | 1.446  | 3.42E-04 | 0.018243  |
| GO:0046914            | transition metal ion binding                      | 8.051  | 3.57E-04 | 0.018131  |
| GO:0008066            | glutamate receptor activity                       | 0.257  | 7.06E-04 | 0.033938  |
| GO:0052742            | phosphatidylinositol kinase activity              | 0.417  | 8.33E-04 | 0.03822   |

(1)

**Table S2. A:** List of most significant gene ontology including cellular component involved in 2073 unique target predications genes found in 8 miRNAs in 1675 cells exposed to IH compared normoxia.

| Cellular Components ID | Term                                   | %       | p Value  | Benjamini |
|------------------------|----------------------------------------|---------|----------|-----------|
| GO:0014069             | GO:0014069~postsynaptic density        | 2.1308  | 2.19E-06 | 0.0017163 |
| GO:0099572             | GO:0099572~postsynaptic specialization | 2.1308  | 2.19E-06 | 0.0017163 |
| GO:0005634             | GO:0005634~nucleus                     | 42.1705 | 7.69E-06 | 0.0030104 |
| GO:0044309             | GO:0044309~neuron spine                | 1.4371  | 1.25E-05 | 0.0032585 |
| GO:0043197             | GO:0043197~dendritic spine             | 1.3875  | 2.52E-05 | 0.0049209 |
| GO:0097060             | GO:0097060~synaptic membrane           | 2.6759  | 2.55E-05 | 0.0039916 |

|            |                     |        |          |           |
|------------|---------------------|--------|----------|-----------|
| GO:0030424 | GO:0030424~axon     | 3.5679 | 8.65E-05 | 0.0112413 |
| GO:0030425 | GO:0030425~dendrite | 3.8652 | 1.13E-04 | 0.012566  |

**Table S2. B:** List of most significant gene ontology including biological process involved in 2073 unique target predications genes found in 8 miRNAs in 1675 cells exposed to IH compared normoxia.

| Biological Process ID+B2:F21 | Biological Process Term                                   | %      | p Value  | Bonferroni |
|------------------------------|-----------------------------------------------------------|--------|----------|------------|
| GO:0010468                   | regulation of gene expression                             | 29.386 | 1.40E-15 | 7.04E-12   |
| GO:0051252                   | regulation of RNA metabolic process                       | 25.818 | 1.70E-14 | 8.29E-11   |
| GO:0006355                   | regulation of transcription, DNA-templated                | 24.381 | 1.85E-12 | 9.02E-09   |
| GO:0006351                   | transcription, DNA-templated                              | 24.232 | 6.59E-12 | 3.22E-08   |
| GO:2000112                   | regulation of cellular macromolecule biosynthetic process | 26.412 | 6.62E-12 | 3.23E-08   |
| GO:2001141                   | regulation of RNA biosynthetic process                    | 24.430 | 7.90E-12 | 3.86E-08   |
| GO:0010556                   | regulation of macromolecule biosynthetic process          | 26.957 | 1.36E-11 | 6.62E-08   |
| GO:0032774                   | RNA biosynthetic process                                  | 25.768 | 2.32E-11 | 1.13E-07   |
| GO:0007399                   | nervous system development                                | 15.709 | 4.03E-11 | 1.97E-07   |
| GO:0016070                   | RNA metabolic process                                     | 29.286 | 1.65E-09 | 8.07E-06   |
| GO:0036211                   | protein modification process                              | 24.678 | 2.07E-09 | 1.01E-05   |
| GO:0006464                   | cellular protein modification process                     | 24.678 | 2.07E-09 | 1.01E-05   |
| GO:0034654                   | nucleobase-containing compound biosynthetic process       | 27.552 | 4.24E-09 | 2.07E-05   |
| GO:0034645                   | cellular macromolecule biosynthetic process               | 31.120 | 4.24E-09 | 2.07E-05   |
| GO:0090304                   | nucleic acid metabolic process                            | 31.467 | 6.53E-08 | 3.19E-04   |
| GO:0043549                   | regulation of kinase activity                             | 6.095  | 3.94E-06 | 0.0190412  |
| GO:0022008                   | neurogenesis                                              | 10.059 | 5.10E-06 | 0.0246064  |
| GO:0048468                   | cell development                                          | 13.033 | 7.29E-06 | 0.034936   |
| GO:0010604                   | positive regulation of macromolecule metabolic process    | 18.038 | 7.76E-06 | 0.0371451  |

**Table S2. C:** List of most of significant gene ontology including molecular function involved in 2073 unique target predications genes found in 8 miRNAs in 1675 cells exposed to IH compared normoxia.

| Molecular Function ID | Molecular Function Term            | %        | p Value  | Benjamini |
|-----------------------|------------------------------------|----------|----------|-----------|
| GO:0000975            | regulatory region DNA binding      | 7.185332 | 7.55E-09 | 4.18E-06  |
| GO:0003690            | double-stranded DNA binding        | 6.838454 | 8.49E-09 | 2.35E-06  |
| GO:0043565            | sequence-specific DNA binding      | 8.473736 | 4.15E-08 | 7.67E-06  |
| GO:0004672            | protein kinase activity            | 5.450942 | 7.98E-07 | 1.11E-04  |
| GO:0001077            | transcriptional activator activity | 2.477701 | 3.05E-06 | 3.38E-04  |
